# Supplementary material for: Comprehensive Characterization of Bile Acids in Human Biological Samples and Effect of 4-Week Strawberry Intake on Bile Acid Composition in Human Plasma
Source: PubMed Central journal article supplement (PMC7916557; doi:10.3390/metabo11020099), 2021-02-10
Supplement: metabolites-11-00099-s001.pdf [file metabolites-11-00099-s001.pdf]

## Supplementary Material

**Table S1.** UHPLC-Q-TOF chromatograms of tentatively identified BAs in human plasma, feces and urine samples.

| Compounds                                | RT<br>(min)       | UHPLC-Q-TOF Qualification      |                                                                            |                         | Reference/s                                                                                   |
|------------------------------------------|-------------------|--------------------------------|----------------------------------------------------------------------------|-------------------------|-----------------------------------------------------------------------------------------------|
|                                          |                   | Observed<br>(m/z) <sup>1</sup> | MS/MS<br>fragments<br>(Quantifier/<br>Qualifier<br>ion) (m/z) <sup>2</sup> | Occurrence <sup>3</sup> |                                                                                               |
| 3-oxo-LCA-isomer 1                       | 12.5              | 373.2728                       | 373.2728                                                                   | F                       |  [13]       |
| 3-oxo-LCA-isomer 2                       | 12.9              | 373.2745                       | 373.2745                                                                   | F                       |  [13]       |
| isoLCA                                   | 12.3              | 375.2899                       | 375.2899                                                                   | F                       |  [13]      |
| LCA                                      | 12.8              | 375.2906                       | 375.2906                                                                   | F                       |  Standard |
| Nor-DCA                                  | 13.0              | 377.2685                       | 377.2685                                                                   | P F U                   |  [13]     |
| 5 $\alpha$ -cholanolic<br>dione isomer 1 | acid-3,6-<br>10.2 | 387.2544                       | 387.2544                                                                   | F                       |  [13]     |
| 5 $\alpha$ -cholanolic<br>dione isomer 2 | acid-3,6-<br>10.5 | 387.2542                       | 387.2542                                                                   | F                       |  [13]     |

|                                        |           |      |          |          |     |                                                                                      |          |
|----------------------------------------|-----------|------|----------|----------|-----|--------------------------------------------------------------------------------------|----------|
| 5 $\alpha$ -cholanic<br>dione isomer 3 | acid-3,6- | 11.1 | 387.2524 | 387.2524 | F   | 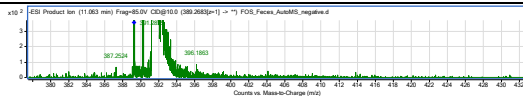   | [13]     |
| 7-oxo-LCA isomer 1                     |           | 9.1  | 389.2696 | 389.2696 | F   |    | [13]     |
| 7-oxo-LCA isomer 2                     |           | 9.5  | 389.2692 | 389.2692 | F   |    | [13]     |
| 7-oxo-LCA isomer 3                     |           | 9.8  | 389.2683 | 389.2683 | F   |    | [13]     |
| 7-oxo-LCA isomer 4                     |           | 10.1 | 389.2699 | 389.2699 | F   |    | [13]     |
| 7-oxo-LCA isomer 5                     |           | 10.4 | 389.2698 | 389.2698 | F   |    | [13]     |
| 7-oxo-LCA isomer 6                     |           | 11.1 | 389.2683 | 389.2683 | F   |   | [13]     |
| 7-oxo-LCA isomer 7                     |           | 13.0 | 389.2701 | 389.2701 | F   |  | [13]     |
| MuriDCA                                |           | 8.3  | 391.2842 | 391.2842 | P F |  | Standard |
| UDCA                                   |           | 8.9  | 391.2845 | 391.2845 | P F |  | Standard |

|                                             |      |          |          |   |   |   |  |          |
|---------------------------------------------|------|----------|----------|---|---|---|--|----------|
| HDCA isomer                                 | 9.7  | 391.2853 | 391.2853 | P | F | U |  | [13]     |
| CDCA                                        | 10.8 | 391.2850 | 391.2850 | P | F |   |  | Standard |
| DCA                                         | 11.1 | 391.2846 | 391.2846 | P | F | U |  | Standard |
| 3 $\alpha$ -hydroxy-6,7-diketocholelic acid | 6.2  | 403.2479 | 403.2479 |   |   | U |  | [13]     |
| 7-oxo-DCA isomer 1                          | 4.8  | 405.2644 | 405.2644 |   | F |   |  | [13]     |
| 7-oxo-DCA isomer 2                          | 7.2  | 405.2639 | 405.2639 |   | F |   |  | [13]     |
| 7-oxo-DCA isomer 3                          | 7.8  | 405.2634 | 405.2634 |   | F |   |  | [13]     |
| $\beta$ -MCA isomer 1                       | 3.1  | 407.2809 | 407.2809 |   | F |   |  | [13]     |
| $\beta$ -MCA isomer 2                       | 4.5  | 407.2804 | 407.2804 |   | F | U |  | [13]     |
| $\beta$ -MCA isomer 3                       | 4.9  | 407.2808 | 407.2808 |   | F | U |  | [13]     |

|                          |      |          |          |       |                                                                                      |              |
|--------------------------|------|----------|----------|-------|--------------------------------------------------------------------------------------|--------------|
| $\beta$ -MCA isomer 4    | 5.3  | 407.2807 | 407.2807 | F     | 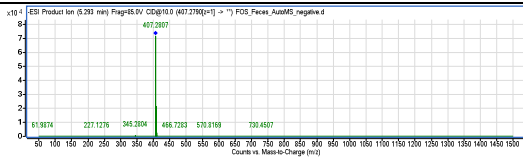   | [13]         |
| $\beta$ -MCA isomer 5    | 6.7  | 407.2805 | 407.2805 | F     |    | [13]         |
| $\beta$ -MCA             | 7.3  | 407.2797 | 407.2797 | F     |    | Standard     |
| HCA isomer 1             | 5.9  | 407.2814 | 407.2814 | F     |    | [13]         |
| HCA isomer 2             | 8.1  | 407.2793 | 407.2793 | F     |    | [13]         |
| HCA isomer 3             | 8.4  | 407.2806 | 407.2806 | F     |   | [13]         |
| CA                       | 8.7  | 407.2809 | 407.2809 | P F   |  | Standard     |
| GLCA                     | 11.1 | 432.3121 | 74.0242  | P     |  | Standard     |
| Glyco-7-oxo-LCA isomer 1 | 4.6  | 446.2900 | 74.0247  | P U   |  | No reference |
| Glyco-7-oxo-LCA isomer 2 | 5.6  | 446.2910 | 74.0239  | P     |  | No reference |
| Glyco-7-oxo-LCA isomer 3 | 7.9  | 446.2894 | 74.0243  | P F U |  | No reference |
| GUDCA isomer 1           | 6.7  | 448.3060 | 74.0244  | P F   |  | Standard     |

|                          |     |          |         |   |   |   |                                                                                                       |              |
|--------------------------|-----|----------|---------|---|---|---|-------------------------------------------------------------------------------------------------------|--------------|
| GUDCA isomer 2           | 7.6 | 448.3068 | 74.0243 | P | F | U | <p>ESI Product Ion (7.633 min) Frag=ES-IV CD@40.0 (448.3073[e-1] → *) RRB Post_AutoMS_negative.d</p>  | Standard     |
| GCDCA                    | 8.9 | 448.3059 | 74.0242 | P | F | F | <p>ESI Product Ion (8.925 min) Frag=ES-IV CD@40.0 (448.3073[e-1] → *) RRB Post_AutoMS_negative.d</p>  | Standard     |
| GDCA                     | 9.3 | 448.3066 | 74.0246 | P | F | F | <p>ESI Product Ion (9.311 min) Frag=ES-IV CD@40.0 (448.3073[e-1] → *) RRB Post_AutoMS_negative.d</p>  | Standard     |
| 3-oxo-LCA-sulfate isomer | 8.1 | 453.2292 | 96.9599 | F | F | F | <p>ESI Product Ion (8.128 min) Frag=ES-IV CD@40.0 (453.2311[e-1] → *) FOS_Force_AutoMS_negative.d</p> | [13]         |
| LCA-sulfate              | 8.3 | 455.2478 | 96.9598 | F | F | F | <p>ESI Product Ion (8.128 min) Frag=ES-IV CD@40.0 (453.2311[e-1] → *) FOS_Force_AutoMS_negative.d</p> | [13]         |
| Glyco-12-oxo-CDCA isomer | 3.9 | 462.2860 | 74.0239 | P | F | F | <p>ESI Product Ion (3.995 min) Frag=ES-IV CD@40.0 (462.2899[e-1] → *) RRB Post_AutoMS_negative.d</p>  | No reference |
| GHCA isomer 1            | 3.0 | 464.3006 | 74.0240 | P | F | U | <p>ESI Product Ion (3.003 min) Frag=ES-IV CD@40.0 (464.3018[e-1] → *) RRB Post_AutoMS_negative.d</p>  | [13]         |
| GHCA isomer 2            | 3.4 | 464.3001 | 74.0245 | P | F | U | <p>ESI Product Ion (3.444 min) Frag=ES-IV CD@40.0 (464.3018[e-1] → *) RRB Post_AutoMS_negative.d</p>  | [13]         |
| GHCA                     | 4.7 | 464.3006 | 74.0242 | P | F | U | <p>ESI Product Ion (4.755 min) Frag=ES-IV CD@40.0 (464.3018[e-1] → *) RRB Post_AutoMS_negative.d</p>  | [13]         |
| GCA                      | 6.9 | 464.3023 | 74.0244 | P | F | F | <p>ESI Product Ion (6.930 min) Frag=ES-IV CD@40.0 (464.3018[e-1] → *) RRB Post_AutoMS_negative.d</p>  | Standard     |

|                              |     |          |         |       |                                                                                      |          |
|------------------------------|-----|----------|---------|-------|--------------------------------------------------------------------------------------|----------|
| 12-oxo-LCA-sulfate           | 3.3 | 469.2265 | 96.9599 | F     | 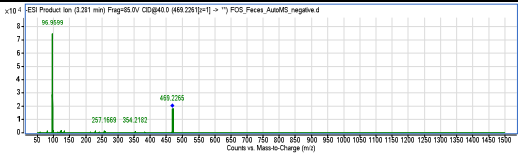   | [13]     |
| CDCA-sulfate isomer 1        | 3.8 | 471.2426 | 96.9598 | F     |    | [13]     |
| CDCA-sulfate isomer 2        | 6.5 | 471.2433 | 96.9597 | F U   |    | [13]     |
| CDCA-sulfate isomer 3        | 7.5 | 471.2425 | 96.9598 | P F U |    | [13]     |
| 12-oxo-CDCA-sulfate isomer 1 | 2.6 | 485.2220 | 96.9598 | F     |   | [13]     |
| CA-sulfate isomer 1          | 2.8 | 487.2377 | 96.9597 | F     |  | [13]     |
| CA-sulfate isomer 2          | 3.5 | 487.2368 | 96.9595 | F     |  | [13]     |
| TCDCa isomer 1               | 7.0 | 498.2896 | 79.9571 | p     |  | Standard |
| TCDCa isomer 2               | 7.7 | 498.2892 | 79.9567 | P     |  | Standard |
| TCDCa isomer 3               | 8.2 | 498.2889 | 79.9565 | P     |  | Standard |

|                                 |     |          |                      |     |                                                                                      |         |
|---------------------------------|-----|----------|----------------------|-----|--------------------------------------------------------------------------------------|---------|
| TCA isomer 1                    | 2.3 | 514.2837 | 514.2837/<br>79.9566 | P F | 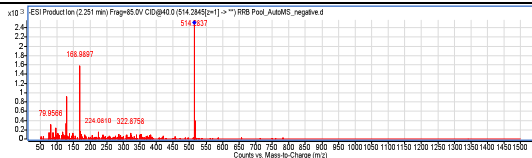   | [13,27] |
| TCA isomer 2                    | 3.2 | 514.2844 | 514.2844/<br>79.9573 | P   |    | [13,27] |
| GCDCA-sulfate isomer 1          | 3.2 | 528.2627 | 74.0242/<br>96.9597  | U   |    | [13]    |
| GCDCA-sulfate isomer 2          | 7.0 | 528.2627 | 74.0245/<br>96.9598  | U   |    | [13]    |
| GCA-sulfate isomer              | 3.4 | 544.2591 | 96.9596/<br>464.3014 | U   |    | [28]    |
| Glucuronide-12-oxo-LCA isomer 1 | 5.4 | 565.3009 | 389.2712/<br>75.0084 | U   |   | [27]    |
| Glucuronide-12-oxo-LCA isomer 2 | 5.8 | 565.2995 | 389.2685/<br>75.0080 | P U |  | [27]    |
| Glucuronide-12-oxo-LCA isomer 3 | 6.4 | 565.3021 | 389.2704/<br>75.0082 | P   |  | [27]    |

|                            |     |          |                       |   |                                                                                      |                                                                                      |              |
|----------------------------|-----|----------|-----------------------|---|--------------------------------------------------------------------------------------|--------------------------------------------------------------------------------------|--------------|
| Glucuronide-CDCA isomer 1  | 4.2 | 567.3178 | 391.2847/<br>75.0077  | U | 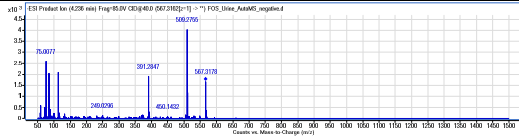   | [27]                                                                                 |              |
| Glucuronide-CDCA isomer 2  | 6.7 | 567.3168 | 391.2858/<br>75.0078  | P | U                                                                                    |    | [27,29]      |
| Glucuronide-CDCA isomer 3  | 8.5 | 567.3175 | 391.2845/<br>75.0080  | P | U                                                                                    |    | [27,29]      |
| Glucuronide-CA isomer 1    | 2.6 | 583.3137 | 407.2799/<br>75.0081  | P | U                                                                                    |    | [27,29]      |
| Glucuronide-CA isomer 2    | 4.0 | 583.3130 | 407.2804/<br>75.0085  | U |    | [27,29]                                                                              |              |
| Glucuronide-CA isomer 3    | 5.3 | 583.3117 | 407.2800/<br>75.0086  | U |  | [27,29]                                                                              |              |
| Glucuronide-CA isomer 4    | 5.9 | 583.3100 | 407.2798/<br>75.0071  | U |  | [27,29]                                                                              |              |
| Glucuronide-GLCA           | 8.6 | 608.3425 | 432.3117/74.<br>.0242 | P |  | No reference                                                                         |              |
| Glucuronide-GCDCA isomer 1 | 3.0 | 624.3400 | 448.3051/<br>74.0245  | P | U                                                                                    |  | No reference |
| Glucuronide-GCDCA isomer 2 | 7.0 | 624.3388 | 448.3070/<br>74.0246  | P | U                                                                                    |  | No reference |



|                            |     |          |                      |   |  |              |
|----------------------------|-----|----------|----------------------|---|--|--------------|
| Glucuronide-GCDCA isomer 3 | 7.4 | 624.3385 | 448.3062/<br>74.0245 | U |  | No reference |
| Glucuronide-GCA isomer 1   | 2.2 | 640.3318 | 464.3014/<br>74.0234 | P |  | No reference |
| Glucuronide-GCA isomer 2   | 2.9 | 640.3344 | 464.3017/<br>74.0240 | U |  | No reference |
| Glucuronide-GCA isomer 3   | 3.3 | 640.3345 | 464.3019/<br>74.0239 | P |  | No reference |

<sup>1</sup>m/z corresponds to [M-H]<sup>-</sup>.

<sup>2</sup>MS/MS fragments: MS/MS fragments listed as Quantifier/Qualifier ion used in the UHPLC-QQQ method. Single transitions means the same ion was used as both quantifier and qualifier ion.

<sup>3</sup>Detected in P, plasma; U, urine; F, feces.

Abbreviations: cholic acid (CA), chenodeoxycholic acid (CDCA), deoxycholic acid (DCA), glycocholic acid (GCA), glycochenodeoxycholic acid (GCDCA), glycodeoxycholic acid (GDCA), glycolithocholic acid (GLCA), glyoursodeoxycholic acid (GUDCA), hyocholic acid (HCA), hyodeoxycholic acid (HDCA), lithocholic acid (LCA), β-muricholic acid (β-MCA), murideoxycholic acid (MuriDCA), taurocholic acid (TCA), taurochenodeoxycholic acid (TCDCA), taurodeoxycholic acid (TDCA), tauroolithocholic acid (TLCA), taoursodeoxycholic acid (TUDCA), taurohyodeoxycholic acid (THDCA), ursodeoxycholic acid (UDCA).

**Table S2. BA standards used for quantification of individual BA metabolites.**

| Standard used for<br>quantification | BA Name                    |
|-------------------------------------|----------------------------|
| CDCA                                | CDCA                       |
| TCDCa                               | TCDCa                      |
| TUDCA                               | TUDCA                      |
| GUDCA                               | GUDCA                      |
| GDCA                                | GDCA                       |
| THDCA                               | THDCA                      |
| TDCA                                | TDCA                       |
| MuriDCA                             | MuriDCA                    |
| UDCA                                | UDCA                       |
| HDCA                                | HDCA                       |
| CA                                  | CA                         |
|                                     | Glucuronide-CA isomer 1    |
|                                     | Glucuronide-CA isomer 2    |
|                                     | CA-sulfate isomer 1        |
|                                     | CA-sulfate isomer 2        |
| GCA                                 | GCA                        |
|                                     | Glucuronide-GCA            |
| TCA                                 | TCA                        |
|                                     | TCA isomer 1               |
|                                     | TCA isomer 2               |
|                                     | TCA isomer 3               |
| $\beta$ -MCA                        | $\beta$ -MCA               |
|                                     | $\beta$ -MCA isomer        |
| HCA                                 | HCA                        |
|                                     | HCA isomer                 |
| GCDCA                               | GCDCA                      |
|                                     | Glucuronide-GCDCA isomer 1 |
|                                     | Glucuronide-GCDCA isomer 2 |
|                                     | GCDCA-sulfate isomer 1     |
|                                     | GCDCA-sulfate isomer 2     |
|                                     | GCDCA-sulfate isomer 3     |
| GLCA                                | GLCA                       |
|                                     | Glucuronide-GLCA           |
|                                     | GLCA-sulfate               |

---

|      |                                                        |
|------|--------------------------------------------------------|
| TLCA | TLCA                                                   |
|      | TLCA-sulfate                                           |
| LCA  | LCA                                                    |
|      | LCA-sulfate, isomer 1                                  |
|      | LCA-sulfate, isomer 2                                  |
|      | LCA-sulfate, isomer 3                                  |
|      | LCA-sulfate, isomer 4                                  |
|      | LCA-sulfate, isomer 5                                  |
|      | 3-OXO-LCA, isomer 1                                    |
|      | 3-OXO-LCA, isomer 2                                    |
|      | 3-OXO-LCA, isomer 3                                    |
|      | 3-OXO-LCA, isomer 4                                    |
|      | Glyco-3-OXO-LCA, isomer 1                              |
|      | Glyco-3-OXO-LCA, isomer 2                              |
|      | Glyco-3-OXO-LCA, isomer 3                              |
|      | 3-OXO-LCA-sulfate, isomer 1                            |
|      | 3-OXO-LCA-sulfate, isomer 2                            |
|      | 3-OXO-LCA-sulfate, isomer 3                            |
|      | 3-OXO-LCA-sulfate, isomer 4                            |
|      | 3-OXO-LCA-sulfate, isomer 5                            |
|      | 3-OXO-LCA-sulfate, isomer 6                            |
|      | 7-OXO-LCA isomer 1                                     |
|      | 7-OXO-LCA isomer 2                                     |
|      | 7-OXO-LCA isomer 3                                     |
|      | 7-OXO-LCA isomer 4                                     |
|      | 7-OXO-LCA isomer 5                                     |
|      | 7-OXO-LCA isomer 6                                     |
|      | 7-OXO-LCA isomer 7                                     |
|      | 7-OXO-LCA isomer 8                                     |
|      | Glyco-7-oxo-LCA isomer 1                               |
|      | Glyco-7-oxo-LCA isomer 2                               |
|      | Glyco-7-oxo-LCA isomer 3                               |
|      | Glyco-7-oxo-LCA isomer 4                               |
|      | Glucuronide-12-oxo-LCA isomer 1                        |
|      | Glucuronide-12-oxo-LCA isomer 2                        |
|      | Glucuronide-12-oxo-LCA isomer 3                        |
|      | 3 $\alpha$ -hydroxy-6,7-diketo cholanic acid, isomer 1 |
|      | 3 $\alpha$ -hydroxy-6,7-diketo cholanic acid, isomer 2 |

---

|     |                                                                  |
|-----|------------------------------------------------------------------|
|     | 3 $\alpha$ -hydroxy-6,7-diketo cholanic acid, isomer 3           |
|     | 9(11),(5 $\beta$ )-cholanic acid-3 $\alpha$ -ol-12-one, isomer 1 |
|     | 9(11),(5 $\beta$ )-cholanic acid-3 $\alpha$ -ol-12-one, isomer 2 |
|     | 9(11),(5 $\beta$ )-cholanic acid-3 $\alpha$ -ol-12-one, isomer 3 |
|     | 9(11),(5 $\beta$ )-cholanic acid-3 $\alpha$ -ol-12-one, isomer 4 |
|     | 9(11),(5 $\beta$ )-cholanic acid-3 $\alpha$ -ol-12-one, isomer 5 |
| DCA | DCA                                                              |
|     | nor-DCA, isomer 1                                                |
|     | nor-DCA, isomer 2                                                |
|     | nor-DCA, isomer 3                                                |
|     | nor-DCA, isomer 4                                                |
|     | nor-DCA, isomer 5                                                |
|     | 7-oxo-DCA isomer 1                                               |
|     | 12-oxo-CDCA-sulfate isomer 1                                     |
|     | 12-oxo-CDCA-sulfate isomer 2                                     |
|     | Glyco-12-oxo-CDCA isomer 1                                       |
|     | Glyco-12-oxo-CDCA isomer 2                                       |
|     | Glyco-12-oxo-CDCA isomer 3                                       |
|     | Glyco-12-oxo-CDCA isomer 4                                       |
|     | Glucuronide-CDCA isomer 1                                        |
|     | Glucuronide-CDCA isomer 2                                        |
|     | Glucuronide-CDCA isomer 3                                        |
|     | Glucuronide-CDCA isomer 4                                        |
|     | Glucuronide-CDCA isomer 5                                        |
|     | CDCA-sulfate isomer 1                                            |
|     | CDCA-sulfate isomer 2                                            |
|     | CDCA-sulfate isomer 3                                            |
|     | CDCA-sulfate isomer 4                                            |

**Table S3. Nutritional composition of control and strawberry beverage (per 50 g portion)<sup>1</sup>**

|                        | Control | Strawberry |
|------------------------|---------|------------|
| Calories (kcal)        | 180     | 172        |
| Total carbohydrate (g) | 44      | 39         |
| Total sugar (g)        | 27      | 29         |

---

|                     |     |       |
|---------------------|-----|-------|
| Dietary fiber (g)   | 5.2 | 8.0   |
| Anthocyanin (mg)    | 0   | 141.7 |
| Ellagitannins (mg)  | 0   | 160.2 |
| Phenolic acids (mg) | 0   | 13.6  |
| Flavan-3-ols (mg)   | 0   | 99.0  |
| Flavonols (mg)      | 0   | 36.2  |

---

<sup>1</sup>Data obtained from Huang *et al.*, 2020 [50].
